# Supplementary material
Source: Springer Nature journal article supplement (https://www.springermedizin.de/resource/supplementary/12935_2011_320_MOESM12_ESM.pdf/9540326)

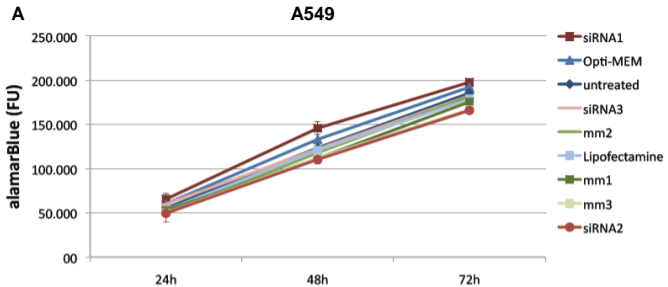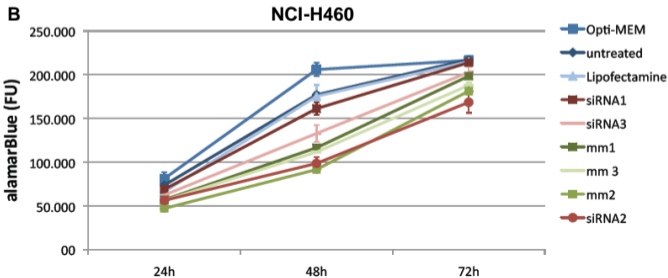

Supplement: MOESM12 [file 9540326]
